# Supplementary material for: Molecular analysis reveals heterogeneity of mouse mammary tumors conditionally mutant for Brca1
Source: Mol Cancer. 2008 Apr 7;7:29. doi: 10.1186/1476-4598-7-29 (PMC2329667; doi:10.1186/1476-4598-7-29)
Supplement: Additional file 4 — List of most variable genes among original and passaged Brca1 mammary tumors. List of 416 probes that in addition to passing intensity and missing-value filters had a minimum 2.5-fold expression change in either direction from the median value in at least 20% of samples, encompassing 5 original independent Brca1 mammary tumors, 4 first-passage and 3 second-passage tumors. Expression ratios for original tumor 0_A1 and the average of expression ratios for transplanted tumors, as well as their fold differences are listed. [file 1476-4598-7-29-S4.xls]

## Sheet: Additional file 8
UniqueID	Acc	UGCluster	Name	Symbol	0_A	Transplanted tumors_Average	fold diff 0/Tr
AGI_MM_OLIGO_A_51_P129464	NM_009128	Mm.193096	Stearoyl-Coenzyme A desaturase 1	Scd1	0.0853184	1.57018	0.0543365
AGI_MM_OLIGO_A_51_P377443	NM_134196	Mm.222642	Vomeronasal 1 receptor, E7	V1re7	1	16.8886	0.0592114
AGI_MM_OLIGO_A_51_P482535	NM_009469	Mm.271898	Unc-51 like kinase 1 (C. elegans)	Ulk1	1	16.6016	0.060235
AGI_MM_OLIGO_A_51_P484526	NM_011915	Mm.32831	Wnt inhibitory factor 1	Wif1	0.116145	1.4925	0.0778191
AGI_MM_OLIGO_A_51_P166886	NM_011314	Mm.200941	Serum amyloid A 2	Saa2	1.57571	19.8921	0.0792126
AGI_MM_OLIGO_A_51_P512754	NM_025449	Mm.10407	Nicolin 1	Nicn1	1	12.0618	0.0829062
AGI_MM_OLIGO_A_51_P287198	NM_033373	Mm.290657	Keratin 23	Krt23	0.276433	2.67549	0.103321
AGI_MM_OLIGO_A_51_P333923	NM_133681	Mm.45994	Tetraspanin 1	Tspan1	0.297921	2.72586	0.109294
AGI_MM_OLIGO_A_51_P480202	NM_010054	Mm.3896	Distal-less homeobox 2	Dlx2	0.394473	3.58169	0.110136
AGI_MM_OLIGO_A_51_P310820	NM_010453	Mm.173	Homeo box A5	Hoxa5	0.122512	0.952617	0.128606
AGI_MM_OLIGO_A_51_P361657	NM_009117	Mm.148800	Serum amyloid A 1	Saa1	1.39668	10.723	0.130251
AGI_MM_OLIGO_A_51_P365153	NM_010474	Mm.12559	Heparan sulfate (glucosamine) 3-O-sulfotransferase 1	Hs3st1	0.914465	6.73281	0.135822
AGI_MM_OLIGO_A_51_P129360	NM_008970	Mm.28440	Parathyroid hormone-like peptide	Pthlh	1.81756	13.2401	0.137277
AGI_MM_OLIGO_A_51_P501145	AK083328	Mm.255219	Lymphoid enhancer binding factor 1	Lef1	0.245365	1.73829	0.141153
AGI_MM_OLIGO_A_51_P453909	NM_007817	Mm.4515	Cytochrome P450, family 2, subfamily f, polypeptide 2	Cyp2f2	0.159984	1.07156	0.1493
AGI_MM_OLIGO_A_51_P158238	AK087696	Mm.22270	Tetraspanin 8	Tspan8	0.368057	2.42853	0.151555
AGI_MM_OLIGO_A_51_P169730	NM_008218	Mm.196110	Hemoglobin alpha, adult chain 1	Hba-a1	0.0361716	0.220869	0.16377
AGI_MM_OLIGO_A_51_P265806	NM_030601	Mm.20897	Chloride channel calcium activated 1	Clca1	1.1607	7.02124	0.165313
AGI_MM_OLIGO_A_51_P313348	NM_007697	Mm.251288	Cell adhesion molecule with homology to L1CAM	Chl1	0.567621	3.305	0.171746
AGI_MM_OLIGO_A_51_P478774	AK033068	Mm.334074	Cholinergic receptor, nicotinic, alpha polypeptide 10	Chrna10	3.6604	21.1043	0.173444
AGI_MM_OLIGO_A_51_P113093	NM_010053	Mm.434306	Distal-less homeobox 1	Dlx1	0.285785	1.61602	0.176844
AGI_MM_OLIGO_A_51_P424211	NM_008557	Mm.263847	FXYD domain-containing ion transport regulator 3	Fxyd3	0.969962	5.15764	0.188063
AGI_MM_OLIGO_A_51_P401987	NM_019432	Mm.24750	Transmembrane protein 37	Tmem37	0.167822	0.891408	0.188266
AGI_MM_OLIGO_A_51_P136084	NM_175328	Mm.246703	Solute carrier family 6 (neurotransmitter transporter), member 15	Slc6a15	0.81169	4.22442	0.192142
AGI_MM_OLIGO_A_51_P423308	NM_008342	Mm.141936	Insulin-like growth factor binding protein 2	Igfbp2	0.15932	0.829147	0.192149
AGI_MM_OLIGO_A_51_P413005	NM_023543	Mm.321147	Chimerin (chimaerin) 2	Chn2	1	5.19164	0.192617
AGI_MM_OLIGO_A_51_P515882	NM_139198	Mm.34609	Placenta-specific 8	Plac8	0.384752	1.98722	0.193613
AGI_MM_OLIGO_A_51_P336830	NM_024406	Mm.582	Fatty acid binding protein 4, adipocyte	Fabp4	0.0177259	0.0906207	0.195605
AGI_MM_OLIGO_A_51_P161636	NM_201375	Mm.390861	Kininogen 2	Kng2	0.0198599	0.101147	0.196347
AGI_MM_OLIGO_A_51_P448856	NM_019680	Mm.36808	E74-like factor 4 (ets domain transcription factor)	Elf4	0.783497	3.94568	0.198571
AGI_MM_OLIGO_A_51_P228765	NM_011409	Mm.290922	Schlafen 3	Slfn3	1.17854	5.61292	0.209969
AGI_MM_OLIGO_A_51_P358700	NM_146902	Mm.330377	Olfactory receptor 1221	Olfr1221	2.94037	13.4216	0.219077
AGI_MM_OLIGO_A_51_P509264	NM_010455	Mm.294826	Homeo box A7	Hoxa7	0.111568	0.507357	0.219901
AGI_MM_OLIGO_A_51_P466709	NM_010642	Mm.5193	Kallikrein 1-related petidase b26	Klk1b26	0.418413	1.89882	0.220354
AGI_MM_OLIGO_A_51_P445683	NM_133732	Mm.261842	RIKEN cDNA 4931406C07 gene	4931406C07Rik	1.74715	7.87927	0.221739
AGI_MM_OLIGO_A_51_P506356	NM_026316	Mm.109341	Aldehyde dehydrogenase 3 family, member B1	Aldh3b1	0.557097	2.51187	0.221786
AGI_MM_OLIGO_A_51_P280455	ENSMUST00000006171	Data not found			0.476649	2.11867	0.224975
AGI_MM_OLIGO_A_51_P374376	NM_146283	Mm.377411	Olfactory receptor 1366	Olfr1366	1.31768	5.83199	0.22594
AGI_MM_OLIGO_A_51_P301007	NM_029299	Mm.45824	Spermatogenesis associated 19	Spata19	1	4.35391	0.229679
AGI_MM_OLIGO_A_51_P516006	AK018789	Mm.130054	Neurotrophic tyrosine kinase, receptor, type 2	Ntrk2	0.503478	2.11444	0.238114
AGI_MM_OLIGO_A_51_P371377	NM_133772	Mm.6667	Single stranded DNA binding protein 4	Ssbp4	0.360232	1.47054	0.244966
AGI_MM_OLIGO_A_51_P268068	X80339	Mm.4645	Sine oculis-related homeobox 1 homolog (Drosophila)	Six1	0.15283	0.62293	0.245341
AGI_MM_OLIGO_A_51_P262401	BC024571	Mm.225096	Integrin alpha 6	Itga6	0.652477	2.6396	0.247188
AGI_MM_OLIGO_A_51_P326439	NM_009802	Mm.232523	Carbonic anhydrase 6	Car6	0.115263	0.466244	0.247216
AGI_MM_OLIGO_A_51_P241101					1.08749	4.39222	0.247594
AGI_MM_OLIGO_A_51_P458568					0.463294	1.86469	0.248456
AGI_MM_OLIGO_A_51_P222153	NM_009419	Mm.250631	Protein-tyrosine sulfotransferase 2	Tpst2	1.16151	4.66584	0.248939
AGI_MM_OLIGO_A_51_P210510	NM_010097	Mm.29027	SPARC-like 1 (mast9, hevin)	Sparcl1	0.0997182	0.400325	0.249093
AGI_MM_OLIGO_A_51_P156108	NM_018827	Mm.335584	Cytokine receptor-like factor 1	Crlf1	1.03526	4.12676	0.250866
AGI_MM_OLIGO_A_51_P321126	NM_007988	Mm.236443	Fatty acid synthase	Fasn	0.21479	0.824497	0.260511
AGI_MM_OLIGO_A_51_P212420	NM_010681	Mm.258065	Laminin, alpha 4	Lama4	0.195332	0.747914	0.261169
AGI_MM_OLIGO_A_51_P220681	NM_009657	Mm.7729	Aldolase 3, C isoform	Aldoc	2.17799	8.33539	0.261295
AGI_MM_OLIGO_A_51_P222353	NM_133918	Mm.286375	Elastin microfibril interfacer 1	Emilin1	0.271307	1.02815	0.26388
AGI_MM_OLIGO_A_51_P263983	NM_146908	Mm.389381	Olfactory receptor 1280	Olfr1280	1.22603	4.63742	0.264379
AGI_MM_OLIGO_A_51_P103237	NM_015755	Mm.125874	Hormonally upregulated Neu-associated kinase	Hunk	0.759962	2.82261	0.269241
AGI_MM_OLIGO_A_51_P270834	M63650	Mm.3280	Twist gene homolog 1 (Drosophila)	Twist1	0.178377	0.65891	0.270715
AGI_MM_OLIGO_A_51_P126998	NM_009621	Mm.1421	A disintegrin-like and metallopeptidase (reprolysin type) with thrombospondin type 1 motif, 1	Adamts1	0.851454	3.05493	0.278715
AGI_MM_OLIGO_A_51_P393426	NM_011173	Mm.127156	Protein S (alpha)	Pros1	1.56049	5.43649	0.28704
AGI_MM_OLIGO_A_51_P451377	NM_023125	Mm.2160	Kininogen 1	Kng1	0.0237818	0.0819798	0.290093
AGI_MM_OLIGO_A_51_P381047	BC026581	Mm.196580	Ubiquitin-conjugating enzyme E2M (UBC12 homolog, yeast)	Ube2m	0.702222	2.40289	0.292241
AGI_MM_OLIGO_A_51_P490137	NM_011896	Mm.330986	Sprouty homolog 1 (Drosophila)	Spry1	0.52015	1.76844	0.294129
AGI_MM_OLIGO_A_51_P235945	NM_017370	Mm.26730	Haptoglobin	Hp	0.181243	0.615551	0.294441
AGI_MM_OLIGO_A_51_P485318	BC058589	Mm.389334	Damage specific DNA binding protein 2	Ddb2	1.8	6.1085	0.294672
AGI_MM_OLIGO_A_51_P223143	AF100425	Mm.426080	Adducin 3 (gamma)	Add3	0.754713	2.554	0.295502
AGI_MM_OLIGO_A_51_P202911	NM_026820	Mm.175661	Interferon induced transmembrane protein 1	Ifitm1	0.211247	0.69958	0.301962
AGI_MM_OLIGO_A_51_P390239	NM_032396	Mm.209989	Kringle containing transmembrane protein 1	Kremen1	1.58447	5.24163	0.302285
AGI_MM_OLIGO_A_51_P439248	NM_008625	Mm.2019	Mannose receptor, C type 1	Mrc1	0.141316	0.466829	0.302716
AGI_MM_OLIGO_A_51_P454008	NM_008489	Mm.218846	Lipopolysaccharide binding protein	Lbp	1.2033	3.94394	0.305101
AGI_MM_OLIGO_A_51_P493987	NM_021509	Mm.285934	Monooxygenase, DBH-like 1	Moxd1	2.11697	6.93373	0.305315
AGI_MM_OLIGO_A_51_P119760	NM_010378	Mm.235338	Histocompatibility 2, class II antigen A, alpha	H2-Aa	1	3.24028	0.308615
AGI_MM_OLIGO_A_51_P508902					0.658383	2.10359	0.312981
AGI_MM_OLIGO_A_51_P267278	NM_021301	Mm.281804	Solute carrier family 15 (H+/peptide transporter), member 2	Slc15a2	0.99516	3.17121	0.313811
AGI_MM_OLIGO_A_51_P243463	AK020023	Mm.361880	RIKEN cDNA 5830471E12 gene	5830471E12Rik	0.325561	1.02208	0.318528
AGI_MM_OLIGO_A_51_P495000	NM_025872	Mm.3676	Golgi transport 1 homolog B (S. cerevisiae)	Golt1b	0.681129	2.0691	0.329191
AGI_MM_OLIGO_A_51_P499201	NM_008723	Mm.1406	Nucleoplasmin 3	Npm3	1.24057	3.75779	0.330132
AGI_MM_OLIGO_A_51_P416749	AB041804	Mm.389786	Coiled-coil domain containing 106	Ccdc106	2.16895	6.55953	0.330657
AGI_MM_OLIGO_A_51_P343689	NM_028122	Mm.33832	Solute carrier family 14 (urea transporter), member 1	Slc14a1	0.363493	1.08036	0.336455
AGI_MM_OLIGO_A_51_P262759	NM_007631	Mm.273049	Cyclin D1	Ccnd1	0.476319	1.40912	0.338026
AGI_MM_OLIGO_A_51_P347312	BC019747	Mm.28013	Opioid growth factor receptor-like 1	Ogfrl1	2.64085	7.72974	0.341648
AGI_MM_OLIGO_A_51_P372172	NM_009384	Mm.124100	T-cell lymphoma invasion and metastasis 1	Tiam1	0.571569	1.66767	0.342735
AGI_MM_OLIGO_A_51_P479029	NM_022413	Mm.296889	Transient receptor potential cation channel, subfamily V, member 6	Trpv6	1	2.88662	0.346425
AGI_MM_OLIGO_A_51_P258620	NM_029391	Mm.262447	RAB4B, member RAS oncogene family	Rab4b	1.752	5.03207	0.348166
AGI_MM_OLIGO_A_51_P110643	NM_010640	Mm.5193	Kallikrein 1-related petidase b26	Klk1b26	0.695923	1.97735	0.351948
AGI_MM_OLIGO_A_51_P212956	NM_020576	Mm.34201	Psoriasis susceptibility 1 candidate 2 (human)	Psors1c2	1.74352	4.92042	0.354343
AGI_MM_OLIGO_A_51_P371279	NM_017480	Mm.42044	Inducible T-cell co-stimulator	Icos	1.4651	4.10522	0.356888
AGI_MM_OLIGO_A_51_P182131	NM_001033304	Mm.316890	RIKEN cDNA 5330417C22 gene	5330417C22Rik	1.13367	3.13701	0.361385
AGI_MM_OLIGO_A_51_P369338	NM_146868	Mm.377728	Olfactory receptor 894	Olfr894	5.33319	14.7201	0.362308
AGI_MM_OLIGO_A_51_P485405	AK005675	Mm.325325	RIKEN cDNA 1700006H03 gene	1700006H03Rik	2.76446	7.61412	0.363071
AGI_MM_OLIGO_A_51_P426677	NM_025403	Mm.272346	Nucleolar protein family A, member 3	Nola3	0.495515	1.35303	0.366226
AGI_MM_OLIGO_A_51_P195958	NM_010929	Mm.173813	Notch gene homolog 4 (Drosophila)	Notch4	3.33804	8.99879	0.370943
AGI_MM_OLIGO_A_51_P377526	NM_009293	Mm.423011	Steroid sulfatase	Sts	0.405845	1.09335	0.371195
AGI_MM_OLIGO_A_51_P279100	NM_008969	Mm.275434	Prostaglandin-endoperoxide synthase 1	Ptgs1	1.04608	2.80411	0.373054
AGI_MM_OLIGO_A_51_P207601	NM_009701	Mm.45580	Aquaporin 5	Aqp5	5.41515	14.417	0.375609
AGI_MM_OLIGO_A_51_P450839	NM_027307	Mm.171335	Golgi phosphoprotein 2	Golph2	1.27987	3.39826	0.376626
AGI_MM_OLIGO_A_51_P256827	NM_013650	Mm.21567	S100 calcium binding protein A8 (calgranulin A)	S100a8	0.67315	1.78258	0.377628
AGI_MM_OLIGO_A_51_P126959	NM_053219	Mm.377143	Vomeronasal 1 receptor, A4	V1ra4	1.34164	3.54038	0.378955
AGI_MM_OLIGO_A_51_P304397	BC100404	Mm.339332	Carboxypeptidase M	Cpm	0.266093	0.699735	0.380276
AGI_MM_OLIGO_A_51_P374707	NM_173007	Mm.21950	Tetraspanin 12	Tspan12	0.256495	0.673232	0.38099
AGI_MM_OLIGO_A_51_P332005	AK003146	Mm.84941	Asteroid homolog 1 (Drosophila)	Aste1	2.1038	5.47341	0.384368
AGI_MM_OLIGO_A_51_P459477	NM_007729	Mm.209715	Procollagen, type XI, alpha 1	Col11a1	0.0869904	0.226094	0.384752
AGI_MM_OLIGO_A_51_P488283					0.913198	2.36966	0.385371
AGI_MM_OLIGO_A_51_P417788	NM_008936	Mm.1386	Paired like homeodomain factor 1	Prop1	0.916369	2.3763	0.385629
AGI_MM_OLIGO_A_51_P331570	NM_144554	Data not found			3.3473	8.59502	0.389447
AGI_MM_OLIGO_A_51_P442402					0.241317	0.619343	0.389634
AGI_MM_OLIGO_A_51_P366811	NM_007470	Mm.2082	Apolipoprotein D	Apod	0.417255	1.0612	0.393193
AGI_MM_OLIGO_A_51_P318830	NM_018803	Mm.261601	Synaptotagmin X	Syt10	1.05702	2.6445	0.399704
AGI_MM_OLIGO_A_51_P173971	NM_146746	Mm.223174	Olfactory receptor 935	Olfr935	4.96227	12.3037	0.403315
AGI_MM_OLIGO_A_51_P144264	NM_008452	Mm.26938	Kruppel-like factor 2 (lung)	Klf2	0.148548	0.367797	0.403886
AGI_MM_OLIGO_A_51_P344770	AK051922	Mm.131328	Trinucleotide repeat containing 6b	Tnrc6b	3.43664	8.50356	0.404142
AGI_MM_OLIGO_A_51_P147034	NM_027407	Mm.17834	Islet cell autoantigen 1-like	Ica1l	5.68831	13.5483	0.419853
AGI_MM_OLIGO_A_51_P107315	NM_145423	Mm.77381	Solute carrier family 5 (iodide transporter), member 8	Slc5a8	1	2.36325	0.423146
AGI_MM_OLIGO_A_51_P517423					0.52015	1.22459	0.424753
AGI_MM_OLIGO_A_51_P295315	NM_020033	Mm.143737	Ankyrin repeat domain 2 (stretch responsive muscle)	Ankrd2	0.38582	0.907685	0.42506
AGI_MM_OLIGO_A_51_P258150	NM_007408	Mm.381	Adipose differentiation related protein	Adfp	0.506628	1.1901	0.425702
AGI_MM_OLIGO_A_51_P313703	NM_008639	Mm.5133	Melatonin receptor 1A	Mtnr1a	4.11816	9.40832	0.437715
AGI_MM_OLIGO_A_51_P262202	A_51_P262202	Data not found			1.72309	3.9026	0.441524
AGI_MM_OLIGO_A_51_P387764	NM_010634	Mm.741	Fatty acid binding protein 5, epidermal	Fabp5	1.58887	3.57393	0.444572
AGI_MM_OLIGO_A_51_P119659	NM_008059	Mm.3283	G0/G1 switch gene 2	G0s2	0.386891	0.869095	0.445165
AGI_MM_OLIGO_A_51_P182303	NM_007743	Mm.277792	Procollagen, type I, alpha 2	Col1a2	0.0575516	0.129248	0.445281
AGI_MM_OLIGO_A_51_P336019	NM_026374	Mm.227258	Interleukin enhancer binding factor 2	Ilf2	2.35708	5.2755	0.446797
AGI_MM_OLIGO_A_51_P399305	NM_013869	Mm.281356	Tumor necrosis factor receptor superfamily, member 19	Tnfrsf19	0.369591	0.807809	0.457522
AGI_MM_OLIGO_A_51_P224865	AK015480	Mm.158744	RIKEN cDNA 4930456L15 gene	4930456L15Rik	2.30537	5.01301	0.459878
AGI_MM_OLIGO_A_51_P183261	NM_007474	Mm.273175	Aquaporin 8	Aqp8	0.137643	0.298663	0.460863
AGI_MM_OLIGO_A_51_P376658	AK004090	Mm.284114	RIKEN cDNA 1110034G24 gene	1110034G24Rik	2.34242	5.05768	0.463141
AGI_MM_OLIGO_A_51_P425962	NM_010158	Mm.17964	KH domain containing, RNA binding, signal transduction associated 3	Khdrbs3	2.0734	4.38872	0.472439
AGI_MM_OLIGO_A_51_P181097	ENSMUST00000021282	Data not found			9.61975	20.3473	0.472779
AGI_MM_OLIGO_A_51_P222033	NM_178070	Mm.322870	Vacuolar protein sorting 33B (yeast)	Vps33b	0.745872	1.56106	0.4778
AGI_MM_OLIGO_A_51_P163034	NM_148933	Mm.133687	Solute carrier organic anion transporter family, member 4a1	Slco4a1	0.632878	1.31909	0.479783
AGI_MM_OLIGO_A_51_P292097					0.819037	1.70578	0.480154
AGI_MM_OLIGO_A_51_P193490	NM_145564	Mm.21912	F-box protein 21	Fbxo21	0.160985	0.332788	0.483748
AGI_MM_OLIGO_A_51_P419439	NM_010321	Mm.29395	Glycine N-methyltransferase	Gnmt	0.272816	0.554762	0.491771
AGI_MM_OLIGO_A_51_P183915	NM_016671	Mm.38386	Interleukin 27 receptor, alpha	Il27ra	0.904379	1.83191	0.493682
AGI_MM_OLIGO_A_51_P147445	AK050154	Mm.31247	Leucine rich repeat containing 28	Lrrc28	0.957271	1.93746	0.494086
AGI_MM_OLIGO_A_51_P312482	NM_026613	Mm.181767	Coiled-coil domain containing 34	Ccdc34	0.908148	1.83041	0.496144
AGI_MM_OLIGO_A_51_P404463	NM_024283	Mm.50109	RIKEN cDNA 1500015O10 gene	1500015O10Rik	1.09657	2.20893	0.496428
AGI_MM_OLIGO_A_51_P215237	NM_207105	Mm.254067	Histocompatibility 2, class II antigen A, beta 1	H2-Ab1	1	2.01129	0.497194
AGI_MM_OLIGO_A_51_P286780	BC028808	Mm.394295	Mus musculus, clone IMAGE:1244192, mRNA		6.1603	12.2513	0.50283
AGI_MM_OLIGO_A_51_P394552	NM_011645	Mm.425318	Protease, serine, 3	Prss3	1.45902	2.87788	0.506978
AGI_MM_OLIGO_A_51_P515605	NM_009930	Mm.249555	Procollagen, type III, alpha 1	Col3a1	0.0564063	0.111109	0.507666
AGI_MM_OLIGO_A_51_P183815	NM_011410	Mm.38192	Schlafen 4	Slfn4	4.73052	9.24384	0.511749
AGI_MM_OLIGO_A_51_P134452	NM_022983	Mm.155520	Endothelial differentiation, lysophosphatidic acid G-protein-coupled receptor 7	Edg7	1	1.9373	0.516181
AGI_MM_OLIGO_A_51_P393224	NM_010382	Mm.22564	Histocompatibility 2, class II antigen E beta	H2-Eb1	1.63354	3.1218	0.523269
AGI_MM_OLIGO_A_51_P478722	NM_011579	Mm.15793	Proteasome (prosome, macropain) 28 subunit, beta	Psme2	0.415235	0.792838	0.523732
AGI_MM_OLIGO_A_51_P181517	NM_144559	Mm.251254	Fc fragment of IgG, low affinity IIIa, receptor	Fcgr3a	1.42701	2.69303	0.529891
AGI_MM_OLIGO_A_51_P501457	NM_022430	Mm.34460	Membrane-spanning 4-domains, subfamily A, member 8A	Ms4a8a	5.47554	10.3137	0.530898
AGI_MM_OLIGO_A_51_P128463	XM_485455	Mm.100168	Glycine/arginine rich protein 1	Grrp1	2.24389	4.1758	0.537355
AGI_MM_OLIGO_A_51_P206405	XM_888896	Mm.41639	Protein tyrosine phosphatase, receptor type Z, polypeptide 1	Ptprz1	0.396667	0.720745	0.550357
AGI_MM_OLIGO_A_51_P413866	NM_008198	Mm.653	Complement factor B	Cfb	0.2581	0.466802	0.552911
AGI_MM_OLIGO_A_51_P316673	NM_144544	Mm.58038	RIKEN cDNA 2210407C18 gene	2210407C18Rik	0.983502	1.72178	0.571213
AGI_MM_OLIGO_A_51_P493570	NM_146505	Mm.377537	Olfactory receptor 148	Olfr148	1.17365	2.05427	0.571321
AGI_MM_OLIGO_A_51_P324037	BG294955	Data not found			2.2253	3.88302	0.573084
AGI_MM_OLIGO_A_51_P493649	NM_023135	Mm.89655	Sulfotransferase family 1E, member 1	Sult1e1	1	1.7402	0.574648
AGI_MM_OLIGO_A_51_P176154	AK054545	Mm.425126	Signal-regulatory protein beta 1	Sirpb1	3.10588	5.33192	0.582506
AGI_MM_OLIGO_A_51_P186172	NM_181681	Mm.29678	Polypyrimidine tract binding protein 1	Ptbp1	0.940826	1.57892	0.595868
AGI_MM_OLIGO_A_51_P478605	NM_010906	Mm.9394	Nuclear factor I/X	Nfix	0.443498	0.740879	0.598611
AGI_MM_OLIGO_A_51_P146164	TC1430646	Data not found			0.155933	0.260156	0.599383
AGI_MM_OLIGO_A_51_P382880	NM_010151	Mm.14297	Nuclear receptor subfamily 2, group F, member 1	Nr2f1	0.086031	0.143478	0.599609
AGI_MM_OLIGO_A_51_P498640	NM_172134	Data not found			0.682074	1.12516	0.606202
AGI_MM_OLIGO_A_51_P375558	NM_010865	Mm.10694	Myocilin	Myoc	0.49039	0.792575	0.618729
AGI_MM_OLIGO_A_51_P410687	NM_018826	Mm.101153	Iroquois related homeobox 5 (Drosophila)	Irx5	1.12506	1.81181	0.620959
AGI_MM_OLIGO_A_51_P402943	NM_009114	Mm.2128	S100 calcium binding protein A9 (calgranulin B)	S100a9	0.535515	0.8601	0.62262
AGI_MM_OLIGO_A_51_P305628	NM_015803	Mm.319599	ATPase, aminophospholipid transporter-like, class I, type 8A, member 2	Atp8a2	0.44013	0.704318	0.624902
AGI_MM_OLIGO_A_51_P279552	NM_016900	Mm.396075	Caveolin 2	Cav2	19.7051	31.4347	0.62686
AGI_MM_OLIGO_A_51_P244287	NM_008482	Mm.172674	Laminin B1 subunit 1	Lamb1-1	0.351111	0.55504	0.632588
AGI_MM_OLIGO_A_51_P185611	NM_028597	Mm.292487	THO complex 3	Thoc3	0.975355	1.54075	0.63304
AGI_MM_OLIGO_A_51_P441426	NM_019932	Mm.332490	Chemokine (C-X-C motif) ligand 4	Cxcl4	0.108142	0.170703	0.633511
AGI_MM_OLIGO_A_51_P408382	NM_001005608	Mm.213873	Integrin beta 4	Itgb4	2.1795	3.42016	0.637253
AGI_MM_OLIGO_A_51_P334104	NM_007833	Mm.56769	Decorin	Dcn	0.0470064	0.0733617	0.640748
AGI_MM_OLIGO_A_51_P392277	AF218265	Mm.214599	Mucin 4	Muc4	5.59446	8.71216	0.642145
AGI_MM_OLIGO_A_51_P301435	NM_033149	Mm.154783	UDP-Gal:betaGlcNAc beta 1,3-galactosyltransferase, polypeptide 5	B3galt5	2.62442	4.07384	0.644213
AGI_MM_OLIGO_A_51_P436977	AK079781	Mm.358846	Dual oxidase 2	Duox2	0.529609	0.818068	0.64739
AGI_MM_OLIGO_A_51_P108190	NM_022891	Data not found			1.21672	1.87295	0.64963
AGI_MM_OLIGO_A_51_P186703					0.366275	0.563527	0.649969
AGI_MM_OLIGO_A_51_P424338	NM_008706	Mm.252	NAD(P)H dehydrogenase, quinone 1	Nqo1	3.52104	5.40392	0.65157
AGI_MM_OLIGO_A_51_P321886					0.892547	1.34699	0.662625
AGI_MM_OLIGO_A_51_P104608	NM_030098	Mm.103835	Ribonuclease, RNase A family, 6	Rnase6	1	1.49547	0.668687
AGI_MM_OLIGO_A_51_P110301	NM_009778	Mm.19131	Complement component 3	C3	0.136408	0.203818	0.669265
AGI_MM_OLIGO_A_51_P364479	NM_009396	Mm.255332	Tumor necrosis factor, alpha-induced protein 2	Tnfaip2	2.18102	3.16704	0.68866
AGI_MM_OLIGO_A_51_P424221					0.635957	0.923242	0.68883
AGI_MM_OLIGO_A_51_P238722					0.204617	0.295884	0.691545
AGI_MM_OLIGO_A_51_P196569	NM_009344	Mm.3117	Pleckstrin homology-like domain, family A, member 1	Phlda1	1.17121	1.68616	0.694603
AGI_MM_OLIGO_A_51_P146956	NM_133229	Mm.42604	Down syndrome critical region homolog 6 (human)	Dscr6	0.761017	1.08631	0.700552
AGI_MM_OLIGO_A_51_P167292	NM_009892	Mm.387173	Chitinase 3-like 3	Chi3l3	7.28536	10.3544	0.703603
AGI_MM_OLIGO_A_51_P494430	NM_031166	Mm.283273	Inhibitor of DNA binding 4	Id4	0.277008	0.392906	0.705023
AGI_MM_OLIGO_A_51_P210956	NM_011693	Mm.76649	Vascular cell adhesion molecule 1	Vcam1	0.586824	0.827156	0.709448
AGI_MM_OLIGO_A_51_P103929	NM_008591	Mm.86844	Met proto-oncogene	Met	2.5403	3.58051	0.709481
AGI_MM_OLIGO_A_51_P354642	AK004981	Mm.358706	ERO1-like beta (S. cerevisiae)	Ero1lb	0.493458	0.687611	0.717642
AGI_MM_OLIGO_A_51_P321158	NM_017372	Mm.45436	Lysozyme	Lyzs	0.883315	1.21317	0.728105
AGI_MM_OLIGO_A_51_P427742	NM_133829	Mm.269793	RIKEN cDNA 2210010L05 gene	2210010L05Rik	2.35055	3.21664	0.730748
AGI_MM_OLIGO_A_51_P383293	AK014261	Mm.7310	RIKEN cDNA 3110079O15 gene	3110079O15Rik	1.01466	1.3796	0.735474
AGI_MM_OLIGO_A_51_P333680	NM_030683	Mm.44158	Solute carrier family 14 (urea transporter), member 2	Slc14a2	0.469761	0.633072	0.742035
AGI_MM_OLIGO_A_51_P368394	NM_019964	Mm.272871	DnaJ (Hsp40) homolog, subfamily B, member 8	Dnajb8	0.399703	0.534178	0.748257
AGI_MM_OLIGO_A_51_P443857	NM_145823	Mm.340968	Phosphatidylinositol transfer protein, cytoplasmic 1	Pitpnc1	1.05702	1.40905	0.750162
AGI_MM_OLIGO_A_51_P213725	XM_989061	Data not found			1	1.32938	0.752228
AGI_MM_OLIGO_A_51_P235816	AF024519	Mm.22216	TSC22 domain family 3	Tsc22d3	0.321524	0.422577	0.760865
AGI_MM_OLIGO_A_51_P306287	AK031425	Mm.358876	Solute carrier family 30 (zinc transporter), member 2	Slc30a2	1.8226	2.39039	0.762471
AGI_MM_OLIGO_A_51_P252725					0.908148	1.17906	0.770232
AGI_MM_OLIGO_A_51_P267303	NM_029362	Mm.262480	Chromatin modifying protein 4B	Chmp4b	0.956608	1.21453	0.787633
AGI_MM_OLIGO_A_51_P150555	NM_053197	Mm.36169	Sideroflexin 3	Sfxn3	2.53327	3.17757	0.797236
AGI_MM_OLIGO_A_51_P341336	NM_025778	Mm.434335	Bcl2-like 14 (apoptosis facilitator)	Bcl2l14	0.687294	0.861445	0.797839
AGI_MM_OLIGO_A_51_P192085	NM_178788	Mm.121549	DCMP deaminase	Dctd	1	1.21577	0.822525
AGI_MM_OLIGO_A_51_P517318	NM_194065	Mm.159750	Williams-Beuren syndrome chromosome region 28 (human)	Wbscr28	2.9302	3.52384	0.831537
AGI_MM_OLIGO_A_51_P412926	NM_010666	Mm.268173	Keratin 26	Krt26	0.276816	0.329488	0.84014
AGI_MM_OLIGO_A_51_P408653	NM_145463	Mm.275409	Transmembrane protein 46	Tmem46	1.21251	1.41807	0.855042
AGI_MM_OLIGO_A_51_P309283	NM_009153	Mm.4083	Sema domain, immunoglobulin domain (Ig), short basic domain, secreted, (semaphorin) 3B	Sema3b	2.85205	3.31854	0.859428
AGI_MM_OLIGO_A_51_P229280	X17373	Mm.2238	Eukaryotic translation initiation factor 3, subunit 10 (theta)	Eif3s10	1.58777	1.8106	0.876929
AGI_MM_OLIGO_A_51_P174943	NM_008485	Mm.329272	Laminin, gamma 2	Lamc2	2.69821	3.0476	0.885354
AGI_MM_OLIGO_A_51_P153053	NM_020561	Mm.2379	Sphingomyelin phosphodiesterase, acid-like 3A	Smpdl3a	0.22688	0.253846	0.893769
AGI_MM_OLIGO_A_51_P352303	NM_011983	Mm.228	Homer homolog 2 (Drosophila)	Homer2	0.85441	0.937869	0.911012
AGI_MM_OLIGO_A_51_P253547					0.426613	0.462369	0.922668
AGI_MM_OLIGO_A_51_P108226	NM_183249	Mm.902	RIKEN cDNA 1100001G20 gene	1100001G20Rik	1.14949	1.21294	0.947696
AGI_MM_OLIGO_A_51_P494241	NM_007534	Mm.435513	B-cell leukemia/lymphoma 2 related protein A1b	Bcl2a1b	3.21095	3.33015	0.964204
AGI_MM_OLIGO_A_51_P109496	NM_027285	Mm.327224	Reduced expression 2	Rex2	0.348928	0.360159	0.968816
AGI_MM_OLIGO_A_51_P407248	NM_054041	Mm.232525	Anthrax toxin receptor 1	Antxr1	0.483638	0.495641	0.975784
AGI_MM_OLIGO_A_51_P358423					1.58557	1.59969	0.991171
AGI_MM_OLIGO_A_51_P405397	NM_007899	Mm.3433	Extracellular matrix protein 1	Ecm1	0.607097	0.612077	0.991864
AGI_MM_OLIGO_A_51_P268331	NM_023270	Mm.27764	Ring finger protein 128	Rnf128	0.534774	0.531303	1.00653
AGI_MM_OLIGO_A_51_P367530	NM_018800	Mm.88818	Synaptotagmin VI	Syt6	0.857376	0.849294	1.00952
AGI_MM_OLIGO_A_51_P456952	NM_013563	Mm.2923	Interleukin 2 receptor, gamma chain	Il2rg	1	0.989424	1.01069
AGI_MM_OLIGO_A_51_P430929	NM_153782	Mm.208662	CDNA sequence BC029169	BC029169	6.2941	6.22243	1.01152
AGI_MM_OLIGO_A_51_P385781	NM_010495	Mm.444	Inhibitor of DNA binding 1	Id1	0.631564	0.624055	1.01203
AGI_MM_OLIGO_A_51_P236486	NM_145386	Data not found			0.104966	0.103587	1.01332
AGI_MM_OLIGO_A_51_P315681	NM_183029	Mm.294740	Insulin-like growth factor 2 mRNA binding protein 2	Igf2bp2	0.894405	0.876663	1.02024
AGI_MM_OLIGO_A_51_P125487	NM_031190	Mm.717	Phosphoglycerate kinase 2	Pgk2	0.64842	0.634552	1.02186
AGI_MM_OLIGO_A_51_P276264	NM_019866	Mm.8012	Spi-B transcription factor (Spi-1/PU.1 related)	Spib	0.538867	0.526787	1.02293
AGI_MM_OLIGO_A_51_P239386	NM_133485	Mm.308126	Protein phosphatase 1, regulatory (inhibitor) subunit 14c	Ppp1r14c	0.42958	0.417777	1.02825
AGI_MM_OLIGO_A_51_P368381	NM_019778	Mm.136238	Zinc finger and BTB domain containing 20	Zbtb20	0.697855	0.671586	1.03912
AGI_MM_OLIGO_A_51_P395476	NM_153533	Mm.29389	Tensin like C1 domain-containing phosphatase	Tenc1	0.296273	0.280946	1.05455
AGI_MM_OLIGO_A_51_P273633	NM_011404	Mm.27943	Solute carrier family 7 (cationic amino acid transporter, y+ system), member 5	Slc7a5	3.12315	2.91507	1.07138
AGI_MM_OLIGO_A_51_P288315	NM_010441	Mm.157190	High mobility group AT-hook 2	Hmga2	2.11697	1.97591	1.07139
AGI_MM_OLIGO_A_51_P375039	NM_011399	Mm.222536	Solute carrier family 25 (mitochondrial carrier, peroxisomal membrane protein), member 17	Slc25a17	0.255607	0.234394	1.0905
AGI_MM_OLIGO_A_51_P137708	NM_027416	Mm.20079	Calmodulin-like 3	Calml3	0.373453	0.340094	1.09809
AGI_MM_OLIGO_A_51_P283384	NM_134200	Mm.405416	Vomeronasal 1 receptor, F3	V1rf3	0.670356	0.608382	1.10187
AGI_MM_OLIGO_A_51_P386358	NM_025830	Mm.390058	WW domain containing E3 ubiquitin protein ligase 2	Wwp2	1.85575	1.68316	1.10254
AGI_MM_OLIGO_A_51_P117952	NM_010479	Mm.6388	Heat shock protein 1A	Hspa1a	0.859161	0.77622	1.10685
AGI_MM_OLIGO_A_51_P142299	NM_178382	Mm.426781	Fibronectin leucine rich transmembrane protein 3	Flrt3	1.51677	1.32214	1.14721
AGI_MM_OLIGO_A_51_P239315	NM_022332	Mm.12051	Suppression of tumorigenicity 7	St7	8.05006	6.88355	1.16946
AGI_MM_OLIGO_A_51_P401907	AK089257	Mm.235340	Predicted gene, EG433016	EG433016	0.324885	0.277783	1.16956
AGI_MM_OLIGO_A_51_P309762	NM_019910	Mm.371556	Demilune cell and parotid protein 1	Dcpp1	0.101955	0.0870927	1.17065
AGI_MM_OLIGO_A_51_P331893	NM_028911	Mm.84567	RIKEN cDNA 4933414I15 gene	4933414I15Rik	0.860949	0.719815	1.19607
AGI_MM_OLIGO_A_51_P279038	NM_008904	Mm.259072	Peroxisome proliferative activated receptor, gamma, coactivator 1 alpha	Ppargc1a	0.402204	0.33343	1.20626
AGI_MM_OLIGO_A_51_P306658	NM_133939	Mm.275158	LSM8 homolog, U6 small nuclear RNA associated (S. cerevisiae)	Lsm8	30.9314	25.2232	1.22631
AGI_MM_OLIGO_A_51_P211506	NM_146071	Mm.153301	Mucin 20	Muc20	8.34551	6.76015	1.23451
AGI_MM_OLIGO_A_51_P408732					1.54649	1.24564	1.24153
AGI_MM_OLIGO_A_51_P221008	BC070451	Mm.138434	GRAM domain containing 1B	Gramd1b	0.168054	0.134221	1.25207
AGI_MM_OLIGO_A_51_P468260	TC1463663	Data not found			0.49039	0.38995	1.25757
AGI_MM_OLIGO_A_51_P223656	NM_008484	Mm.435441	Laminin, beta 3	Lamb3	6.15603	4.87704	1.26225
AGI_MM_OLIGO_A_51_P231288					1.77276	1.40175	1.26468
AGI_MM_OLIGO_A_51_P433540	NM_001008233	Mm.423124	Pleckstrin homology domain containing, family N member 1	Plekhn1	0.991717	0.781424	1.26911
AGI_MM_OLIGO_A_51_P332169	NM_173390	Mm.297971	NHS-like 1	Nhsl1	3.21318	2.53048	1.26979
AGI_MM_OLIGO_A_51_P302016	NM_183260	Data not found			3.27161	2.50391	1.3066
AGI_MM_OLIGO_A_51_P459108	NM_013754	Mm.306511	Insulin-like 6	Insl6	1.3765	1.04761	1.31393
AGI_MM_OLIGO_A_51_P513560	AK017897	Mm.248648	Syntaxin 11	Stx11	1.27987	0.973584	1.3146
AGI_MM_OLIGO_A_51_P409570	NM_146156	Mm.22778	PDLIM1 interacting kinase 1 like	Pdik1l	0.79664	0.603416	1.32022
AGI_MM_OLIGO_A_51_P357983	NM_009188	Mm.2137	Transcriptional regulator, SIN3B (yeast)	Sin3b	1.04899	0.791203	1.32581
AGI_MM_OLIGO_A_51_P112223	NM_010357	Mm.2662	Glutathione S-transferase, alpha 4	Gsta4	0.438151	0.329345	1.33037
AGI_MM_OLIGO_A_51_P190254	AK129084	Mm.41557	Secernin 1	Scrn1	0.1386	0.102845	1.34766
AGI_MM_OLIGO_A_51_P409010	NM_016685	Mm.45071	Cartilage oligomeric matrix protein	Comp	1	0.738357	1.35436
AGI_MM_OLIGO_A_51_P496845	NM_007604	Mm.392504	Capping protein (actin filament) muscle Z-line, alpha 2	Capza2	6.98374	5.13728	1.35942
AGI_MM_OLIGO_A_51_P332414	AK048069	Mm.390609	Hypothetical protein LOC328277	LOC328277	3.47979	2.53891	1.37058
AGI_MM_OLIGO_A_51_P337195	NM_008952	Mm.8543	Pipecolic acid oxidase	Pipox	0.562529	0.406466	1.38395
AGI_MM_OLIGO_A_51_P284608	NM_010545	Mm.43778	Ribosomal protein S14	Rps14	2.61897	1.87443	1.39721
AGI_MM_OLIGO_A_51_P501844	NM_175475	Mm.255246	Cytochrome P450, family 26, subfamily b, polypeptide 1	Cyp26b1	1.93589	1.37529	1.40762
AGI_MM_OLIGO_A_51_P208083	NM_009115	Mm.235998	S100 protein, beta polypeptide, neural	S100b	0.57995	0.410275	1.41356
AGI_MM_OLIGO_A_51_P309307	ENSMUST00000062945	Data not found			8.23632	5.76007	1.4299
AGI_MM_OLIGO_A_51_P135944	M92418	Mm.359610	Stefin A2	Stfa2	0.444729	0.309609	1.43642
AGI_MM_OLIGO_A_51_P504815					0.091823	0.0625224	1.46864
AGI_MM_OLIGO_A_51_P132185	NM_001001332	Mm.425966	Stefin A3	Stfa3	0.225938	0.151174	1.49455
AGI_MM_OLIGO_A_51_P146560	NM_018857	Mm.17510	Mesothelin	Msln	0.689203	0.458738	1.50239
AGI_MM_OLIGO_A_51_P291438	NM_011607	Mm.980	Tenascin C	Tnc	2.24389	1.4744	1.52189
AGI_MM_OLIGO_A_51_P503494	NM_018790	Mm.25405	Activity regulated cytoskeletal-associated protein	Arc	4.94167	3.22166	1.53389
AGI_MM_OLIGO_A_51_P494125	NM_007431	Mm.288186	Alkaline phosphatase 2, liver	Akp2	1.20748	0.774143	1.55976
AGI_MM_OLIGO_A_51_P456465	NM_021386	Mm.390755	Claudin 10	Cldn10	0.479632	0.303782	1.57887
AGI_MM_OLIGO_A_51_P268824	NM_172659	Mm.41203	Solute carrier family 2 (facilitated glucose transporter), member 6	Slc2a6	3.94767	2.49336	1.58327
AGI_MM_OLIGO_A_51_P302358	NM_008518	Mm.1715	Lymphotoxin B	Ltb	5.49454	3.45234	1.59154
AGI_MM_OLIGO_A_51_P154753	NM_146182	Mm.213403	Kinesin light chain 3	Klc3	8.90737	5.27515	1.68855
AGI_MM_OLIGO_A_51_P517388	NM_025806	Mm.3311	RIKEN cDNA 1100001H23 gene	1100001H23Rik	0.55787	0.329968	1.69068
AGI_MM_OLIGO_A_51_P258409					1.58447	0.927779	1.70781
AGI_MM_OLIGO_A_51_P181474	NM_008134	Mm.219621	Glycosylation dependent cell adhesion molecule 1	Glycam1	13.3892	7.66443	1.74693
AGI_MM_OLIGO_A_51_P188141	NM_008522	Mm.282359	Lactotransferrin	Ltf	17.7285	10.016	1.77002
AGI_MM_OLIGO_A_51_P305889	NM_021050	Mm.15621	Cystic fibrosis transmembrane conductance regulator homolog	Cftr	15.5517	8.72879	1.78166
AGI_MM_OLIGO_A_51_P141410	NM_010796	Mm.252405	Macrophage galactose N-acetyl-galactosamine specific lectin 1	Mgl1	1	0.555399	1.80051
AGI_MM_OLIGO_A_51_P225224	NM_019564	Mm.30156	HtrA serine peptidase 1	Htra1	0.664804	0.367064	1.81114
AGI_MM_OLIGO_A_51_P432924	NM_153598	Mm.281844	UDP glucuronosyltransferase 2 family, polypeptide B34	Ugt2b34	2.6226	1.44423	1.81592
AGI_MM_OLIGO_A_51_P383270	NM_175473	Mm.291120	Fraser syndrome 1 homolog (human)	Fras1	0.53812	0.291788	1.84422
AGI_MM_OLIGO_A_51_P113753	NM_133192	Mm.319690	Neuropeptide FF receptor 2	Npffr2	2.97317	1.61111	1.84542
AGI_MM_OLIGO_A_51_P384894	NM_001001332	Mm.425966	Stefin A3	Stfa3	0.339386	0.1798	1.88758
AGI_MM_OLIGO_A_51_P148032	NM_177364	Mm.227616	SH3 and PX domains 2B	Sh3pxd2b	3.35427	1.77336	1.89148
AGI_MM_OLIGO_A_51_P484111	NM_016762	Mm.396856	Matrilin 2	Matn2	0.445964	0.233997	1.90586
AGI_MM_OLIGO_A_51_P418875	NM_001013789	Data not found			2.30378	1.16978	1.9694
AGI_MM_OLIGO_A_51_P439970					1.99446	1.00552	1.98352
AGI_MM_OLIGO_A_51_P144090	NM_030696	Mm.28632	Solute carrier family 16 (monocarboxylic acid transporters), member 3	Slc16a3	1.33978	0.672581	1.992
AGI_MM_OLIGO_A_51_P380078	ENSMUST00000076648	Data not found			2.16895	1.08637	1.99651
AGI_MM_OLIGO_A_51_P248243	NM_010903	Mm.42138	Nuclear factor, erythroid derived 2, like 3	Nfe2l3	3.84238	1.92206	1.99909
AGI_MM_OLIGO_A_51_P103222	NM_028064	Mm.276829	Solute carrier family 39 (zinc transporter), member 4	Slc39a4	1.0324	0.5114	2.01877
AGI_MM_OLIGO_A_51_P444301	NM_018819	Mm.288510	Brain protein 44-like	Brp44l	0.220065	0.107637	2.0445
AGI_MM_OLIGO_A_51_P356642	NM_008471	Mm.4646	Keratin 13	Krt13	1.61328	0.781476	2.06441
AGI_MM_OLIGO_A_51_P451588	NM_013746	Mm.26633	Pleckstrin homology domain containing, family B (evectins) member 1	Plekhb1	6.10927	2.94506	2.07441
AGI_MM_OLIGO_A_51_P498483	NM_172869	Mm.221597	FERM domain containing 3	Frmd3	1	0.480736	2.08014
AGI_MM_OLIGO_A_51_P311476	NM_177740	Mm.333943	RGM domain family, member A	Rgma	1.15829	0.550916	2.10248
AGI_MM_OLIGO_A_51_P385697	NM_010795	Mm.299693	Mannoside acetylglucosaminyltransferase 3	Mgat3	0.445346	0.208245	2.13857
AGI_MM_OLIGO_A_51_P355801	M77174	Data not found			0.628071	0.283904	2.21227
AGI_MM_OLIGO_A_51_P387239	NM_021792	Mm.261140	Interferon inducible GTPase 1	Iigp1	4.77004	2.09861	2.27295
AGI_MM_OLIGO_A_51_P457244	NM_021365	Mm.104764	X-linked lymphocyte-regulated 4B	Xlr4b	0.449378	0.196178	2.29066
AGI_MM_OLIGO_A_51_P282523	NM_054044	Mm.87046	G protein-coupled receptor 124	Gpr124	0.510152	0.221911	2.2989
AGI_MM_OLIGO_A_51_P268625	NM_007992	Mm.249146	Fibulin 2	Fbln2	3.42001	1.48285	2.30637
AGI_MM_OLIGO_A_51_P270741					3.14705	1.358	2.31742
AGI_MM_OLIGO_A_51_P370090	NM_008026	Mm.258908	Friend leukemia integration 1	Fli1	1.72788	0.744653	2.32038
AGI_MM_OLIGO_A_51_P210310	XM_977330	Mm.333026	T-cell receptor beta, variable 13	Tcrb-V13	0.412081	0.17698	2.32841
AGI_MM_OLIGO_A_51_P359822	NM_009160	Mm.1321	Surfactant associated protein D	Sftpd	1.32501	0.568047	2.33257
AGI_MM_OLIGO_A_51_P291078	NM_172710	Mm.235020	RIKEN cDNA 2310045A20 gene	2310045A20Rik	0.831046	0.356034	2.33417
AGI_MM_OLIGO_A_51_P276943	NM_016696	Mm.297976	Glypican 1	Gpc1	0.864537	0.3691	2.34229
AGI_MM_OLIGO_A_51_P193159	NM_001013789	Data not found			2.37512	1.00998	2.35166
AGI_MM_OLIGO_A_51_P181751	NM_207267	Mm.381904	RIKEN cDNA 4930488E11 gene	4930488E11Rik	1.9292	0.810239	2.38102
AGI_MM_OLIGO_A_51_P425514					3.95314	1.62829	2.42778
AGI_MM_OLIGO_A_51_P157381	AY523601	Mm.41603	Calcium/calmodulin-dependent protein kinase II inhibitor 1	Camk2n1	2.89588	1.18735	2.43894
AGI_MM_OLIGO_A_51_P453635	NM_010784	Mm.906	Midkine	Mdk	1.65061	0.673906	2.44932
AGI_MM_OLIGO_A_51_P478486	AK038226	Mm.277680	Fusion, derived from t(12;16) malignant liposarcoma (human)	Fus	1.16312	0.47399	2.45389
AGI_MM_OLIGO_A_51_P311038	NM_001024139	Mm.65867	A disintegrin-like and metallopeptidase (reprolysin type) with thrombospondin type 1 motif, 15	Adamts15	2.63902	1.05682	2.49713
AGI_MM_OLIGO_A_51_P445370	NM_173052	Mm.314490	Serine (or cysteine) peptidase inhibitor, clade B, member 1b	Serpinb1b	0.131124	0.0522931	2.50747
AGI_MM_OLIGO_A_51_P338040	NM_146168	Mm.24642	Expressed sequence AW146242	AW146242	0.512634	0.201258	2.54714
AGI_MM_OLIGO_A_51_P161225	NM_145975	Mm.202725	DEAD (Asp-Glu-Ala-Asp) box polypeptide 46	Ddx46	3.59253	1.40104	2.56419
AGI_MM_OLIGO_A_51_P381178	AK038975	Mm.307728	BTB (POZ) domain containing 4	Btbd4	1.5042	0.5802	2.59256
AGI_MM_OLIGO_A_51_P496779	NM_194462	Mm.46044	Cytochrome P450, family 51	Cyp51	0.989657	0.381329	2.59528
AGI_MM_OLIGO_A_51_P485655					2.48113	0.941357	2.6357
AGI_MM_OLIGO_A_51_P225668	NM_010784	Mm.906	Midkine	Mdk	2.36199	0.880007	2.68405
AGI_MM_OLIGO_A_51_P381683	NM_007377	Mm.6826	Apoptosis-associated tyrosine kinase	Aatk	0.419575	0.153857	2.72704
AGI_MM_OLIGO_A_51_P494825	BC082308	Mm.103246	Malignant fibrous histiocytoma amplified sequence 1	Mfhas1	1.69584	0.618627	2.7413
AGI_MM_OLIGO_A_51_P291260	XM_976153	Mm.33401	Maltase-glucoamylase	Mgam	1.67946	0.611711	2.74552
AGI_MM_OLIGO_A_51_P282754	NM_011066	Mm.218141	Period homolog 2 (Drosophila)	Per2	1.04319	0.375544	2.77781
AGI_MM_OLIGO_A_51_P338443	NM_020581	Mm.196189	Angiopoietin-like 4	Angptl4	0.720964	0.259285	2.78059
AGI_MM_OLIGO_A_51_P420276	NM_026162	Mm.313938	Plexin domain containing 2	Plxdc2	1.0367	0.372548	2.78273
AGI_MM_OLIGO_A_51_P356580	NM_026280	Mm.64962	Matrix-remodelling associated 7	Mxra7	1.68296	0.600313	2.80347
AGI_MM_OLIGO_A_51_P341177	NM_016765	Mm.1457	Dimethylarginine dimethylaminohydrolase 2	Ddah2	0.650671	0.231043	2.81624
AGI_MM_OLIGO_A_51_P438820	NM_023258	Mm.24163	PYD and CARD domain containing	Pycard	1.16797	0.411339	2.83943
AGI_MM_OLIGO_A_51_P106779	NM_080285	Mm.224189	Cortactin binding protein 2	Cttnbp2	0.810003	0.282868	2.86354
AGI_MM_OLIGO_A_51_P212741	NM_001014761	Data not found			1	0.345726	2.89246
AGI_MM_OLIGO_A_51_P324351	NM_013900	Mm.30988	Antigen p97 (melanoma associated) identified by monoclonal antibodies 133.2 and 96.5	Mfi2	0.170755	0.056745	3.00917
AGI_MM_OLIGO_A_51_P516870	NM_008409	Mm.193	Integral membrane protein 2A	Itm2a	0.0223435	0.00741049	3.01512
AGI_MM_OLIGO_A_51_P254471					2.03073	0.673478	3.01529
AGI_MM_OLIGO_A_51_P274124	NM_026345	Mm.57648	MANSC domain containing 1	Mansc1	5.75175	1.84285	3.12111
AGI_MM_OLIGO_A_51_P391466	NM_019410	Mm.271744	Profilin 2	Pfn2	0.780245	0.246899	3.16018
AGI_MM_OLIGO_A_51_P472159	NM_144861	Mm.28427	CDNA sequence BC021395	BC021395	8.50317	2.67137	3.18308
AGI_MM_OLIGO_A_51_P145631	AK158571	Mm.386823	Growth arrest specific 2	Gas2	0.706617	0.217854	3.24353
AGI_MM_OLIGO_A_51_P425824	NM_026125	Mm.29140	C1q domain containing 2	C1qdc2	1.31768	0.405044	3.25317
AGI_MM_OLIGO_A_51_P386612	NM_027153	Mm.293463	Pirin	Pir	1	0.307111	3.25616
AGI_MM_OLIGO_A_51_P296456	XM_902605	Mm.31567	Ankyrin repeat domain 11	Ankrd11	2.11844	0.646835	3.27508
AGI_MM_OLIGO_A_51_P463060	NM_144805	Mm.29739	Transmembrane protein 40	Tmem40	3.17554	0.963337	3.29639
AGI_MM_OLIGO_A_51_P455647	NM_009801	Mm.1186	Carbonic anhydrase 2	Car2	1.25006	0.378294	3.30447
AGI_MM_OLIGO_A_51_P457989	NM_027491	Mm.300814	Ras-related GTP binding D	Rragd	0.457233	0.137472	3.32601
AGI_MM_OLIGO_A_51_P374726	NM_008987	Mm.276776	Pentraxin related gene	Ptx3	2.79723	0.833046	3.35783
AGI_MM_OLIGO_A_51_P146760	NM_053145	Mm.172449	Protocadherin beta 20	Pcdhb20	2.37019	0.702133	3.37569
AGI_MM_OLIGO_A_51_P506045	NM_018755	Data not found			2.20993	0.65344	3.38199
AGI_MM_OLIGO_A_51_P347452	NM_028242	Mm.2152	HIV TAT specific factor 1	Htatsf1	1.89474	0.5591	3.38891
AGI_MM_OLIGO_A_51_P157255	NM_008304	Mm.234266	Syndecan 2	Sdc2	2.25324	0.651818	3.45685
AGI_MM_OLIGO_A_51_P207591	NM_013473	Mm.3267	Annexin A8	Anxa8	2.80986	0.797973	3.52125
AGI_MM_OLIGO_A_51_P147284	NM_198014	Mm.27548	SLAIN motif family, member 1	Slain1	2.45547	0.684771	3.58583
AGI_MM_OLIGO_A_51_P180891	NM_028341	Mm.52526	RIKEN cDNA 2810439F02 gene	2810439F02Rik	2.14801	0.594835	3.6111
AGI_MM_OLIGO_A_51_P214985	NM_145492	Mm.40325	Zinc finger protein 521	Zfp521	0.855595	0.236467	3.61824
AGI_MM_OLIGO_A_51_P291417	NM_009378	Mm.24096	Thrombomodulin	Thbd	0.267387	0.0738161	3.62234
AGI_MM_OLIGO_A_51_P337412	NM_146015	Mm.44176	Epidermal growth factor-containing fibulin-like extracellular matrix protein 1	Efemp1	0.259895	0.0709877	3.66113
AGI_MM_OLIGO_A_51_P162162	NM_009349	Mm.299	Indolethylamine N-methyltransferase	Inmt	1.30677	0.356022	3.67046
AGI_MM_OLIGO_A_51_P340788	NM_008357	Mm.4392	Interleukin 15	Il15	2.7283	0.741864	3.67762
AGI_MM_OLIGO_A_51_P378227					5.7041	1.54687	3.68752
AGI_MM_OLIGO_A_51_P479688	NM_173370	Mm.46764	CDP-diacylglycerol synthase 1	Cds1	1.02598	0.277409	3.69843
AGI_MM_OLIGO_A_51_P508859	NM_183188	Mm.370334	Ataxin 2 binding protein 1	A2bp1	0.0533636	0.0142486	3.74519
AGI_MM_OLIGO_A_51_P186101	NM_009982	Mm.322945	Cathepsin C	Ctsc	10.5707	2.81217	3.75892
AGI_MM_OLIGO_A_51_P109258	NM_138686	Mm.52265	Cystin 1	Cys1	0.427798	0.113578	3.76656
AGI_MM_OLIGO_A_51_P341203	NM_017396	Mm.379071	Cytochrome P450, family 3, subfamily a, polypeptide 41	Cyp3a41	0.56331	0.144302	3.90368
AGI_MM_OLIGO_A_51_P204831	M13018	Mm.272368	Cysteine-rich protein 1 (intestinal)	Crip1	3.2898	0.839379	3.91933
AGI_MM_OLIGO_A_51_P145453	L04961	Mm.274770	Inactive X specific transcripts	Xist	0.942131	0.238493	3.95035
AGI_MM_OLIGO_A_51_P333517					1.49381	0.372992	4.00495
AGI_MM_OLIGO_A_51_P333622	BC029089	Mm.142607	RIKEN cDNA 2010300C02 gene	2010300C02Rik	2.88186	0.719133	4.00741
AGI_MM_OLIGO_A_51_P339023	NM_175445	Mm.204737	Ras association (RalGDS/AF-6) domain family 2	Rassf2	2.03073	0.504371	4.02627
AGI_MM_OLIGO_A_51_P343517	NM_010742	Mm.878	Lymphocyte antigen 6 complex, locus D	Ly6d	3.08228	0.764211	4.03329
AGI_MM_OLIGO_A_51_P312328	NM_022415	Mm.28768	Prostaglandin E synthase	Ptges	5.0806	1.25272	4.05566
AGI_MM_OLIGO_A_51_P192955	BG921888	Data not found			1.15349	0.280345	4.11452
AGI_MM_OLIGO_A_51_P125467	NM_010515	Mm.26553	Insulin-like growth factor 2 receptor	Igf2r	1.29684	0.312765	4.14637
AGI_MM_OLIGO_A_51_P256665	NM_173006	Mm.9122	Paraoxonase 3	Pon3	1.20999	0.290295	4.16815
AGI_MM_OLIGO_A_51_P258570	NM_011177	Mm.3944	Kallikrein related-peptidase 6	Klk6	13.6611	3.24473	4.21024
AGI_MM_OLIGO_A_51_P306193	NM_212440	Data not found			9.28563	2.16019	4.29852
AGI_MM_OLIGO_A_51_P258817	NM_015767	Mm.24375	Tocopherol (alpha) transfer protein	Ttpa	2.37183	0.550887	4.30547
AGI_MM_OLIGO_A_51_P497692	NM_023788	Mm.6890	Melanoma antigen, family H, 1	Mageh1	1.20999	0.272698	4.43712
AGI_MM_OLIGO_A_51_P520849	NM_009144	Mm.19155	Secreted frizzled-related protein 2	Sfrp2	0.508387	0.114324	4.44689
AGI_MM_OLIGO_A_51_P170816	NM_019867	Mm.435439	Neuronal guanine nucleotide exchange factor	Ngef	1.57789	0.352511	4.47615
AGI_MM_OLIGO_A_51_P278868	NM_010387	Mm.195060	Histocompatibility 2, class II, locus Mb1	H2-DMb1	18.7654	4.11274	4.56274
AGI_MM_OLIGO_A_51_P295904	NM_028934	Mm.271901	RIKEN cDNA 4930452B06 gene	4930452B06Rik	1.57899	0.344042	4.58952
AGI_MM_OLIGO_A_51_P221223					0.26962	0.0587056	4.59275
AGI_MM_OLIGO_A_51_P346893	NM_019578	Mm.30978	Exostoses (multiple)-like 1	Extl1	6.66221	1.44293	4.61713
AGI_MM_OLIGO_A_51_P222973	NM_138949	Mm.168530	Zinc finger protein 286	Zfp286	1.0367	0.216698	4.78408
AGI_MM_OLIGO_A_51_P248865	NM_010225	Mm.390554	Forkhead box F2	Foxf2	1.12584	0.229866	4.89781
AGI_MM_OLIGO_A_51_P149885	S46792	Data not found			0.735094	0.15002	4.89996
AGI_MM_OLIGO_A_51_P142744	NM_172294	Mm.45563	Sulfatase 1	Sulf1	1.08749	0.220366	4.93492
AGI_MM_OLIGO_A_51_P216549	NM_011641	Mm.20894	Transformation related protein 63	Trp63	2.39164	0.478057	5.00283
AGI_MM_OLIGO_A_51_P366948	NM_009257	Mm.268618	Serine (or cysteine) peptidase inhibitor, clade B, member 5	Serpinb5	9.3567	1.80693	5.17822
AGI_MM_OLIGO_A_51_P213099	BB665367	Mm.397026	Netrin G1	Ntng1	0.961927	0.185136	5.1958
AGI_MM_OLIGO_A_51_P477121	NM_021451	Mm.271878	Phorbol-12-myristate-13-acetate-induced protein 1	Pmaip1	8.47375	1.62586	5.21187
AGI_MM_OLIGO_A_51_P228276	NM_008095	Mm.12468	Glioblastoma amplified sequence	Gbas	1.07624	0.201529	5.34037
AGI_MM_OLIGO_A_51_P302327	NM_008496	Mm.20973	Lectin, galactose binding, soluble 7	Lgals7	2.23923	0.418082	5.35595
AGI_MM_OLIGO_A_51_P481257	NM_023755	Data not found			6.57504	1.22358	5.37363
AGI_MM_OLIGO_A_51_P160439	NM_174848	Mm.246424	Myc induced nuclear antigen	Mina	1.33886	0.248449	5.38885
AGI_MM_OLIGO_A_51_P466270	NM_010417	Mm.277092	Hephaestin	Heph	0.540363	0.0977103	5.53025
AGI_MM_OLIGO_A_51_P479181	NM_009704	Mm.8039	Amphiregulin	Areg	16.1672	2.86759	5.63792
AGI_MM_OLIGO_A_51_P158018	NM_026279	Mm.45533	RIKEN cDNA 2310026E23 gene	2310026E23Rik	0.838568	0.144084	5.81999
AGI_MM_OLIGO_A_51_P479818	NM_028894	Mm.327654	LON peptidase N-terminal domain and ring finger 3	Lonrf3	8.04448	1.35926	5.91828
AGI_MM_OLIGO_A_51_P443387					5.95458	0.944252	6.30613
AGI_MM_OLIGO_A_51_P220370	NM_133751	Mm.181475	RIKEN cDNA 1700060H10 gene	1700060H10Rik	1.7593	0.276506	6.36261
AGI_MM_OLIGO_A_51_P232868	NM_176995	Data not found			2.97111	0.45611	6.51401
AGI_MM_OLIGO_A_51_P233153	NM_153163	Mm.379572	Ca2+-dependent activator protein for secretion 2	Cadps2	11.4557	1.71337	6.6861
AGI_MM_OLIGO_A_51_P458778	NM_008278	Mm.18832	Hydroxyprostaglandin dehydrogenase 15 (NAD)	Hpgd	1.22774	0.17288	7.10165
AGI_MM_OLIGO_A_51_P257938	NM_020047	Mm.360305	Tumor-associated calcium signal transducer 2	Tacstd2	8.6578	1.19853	7.22368
AGI_MM_OLIGO_A_51_P151732	NM_019645	Mm.4494	Plakophilin 1	Pkp1	4.7207	0.641879	7.3545
AGI_MM_OLIGO_A_51_P491379	NM_007784	Mm.427467	Casein alpha s1	Csn1s1	482.706	61.3832	7.86381
AGI_MM_OLIGO_A_51_P326229					6.34227	0.638065	9.93985
AGI_MM_OLIGO_A_51_P126789	NM_020043	Mm.209041	Neighbor of Punc E11	Nope	1	0.0920195	10.8673
AGI_MM_OLIGO_A_51_P422143	NM_007785	Mm.4908	Casein alpha s2-like A	Csn1s2a	481.036	33.2018	14.4882
